# Supplementary material for: Cordyceps militaris Induces Immunogenic Cell Death and Enhances Antitumor Immunogenic Response in Breast Cancer
Source: Hindawi journal article supplement (doi:10.1155/2020/9053274), 2020-01-01
Supplement: f1 [file 9053274.f1.pdf]

**a**

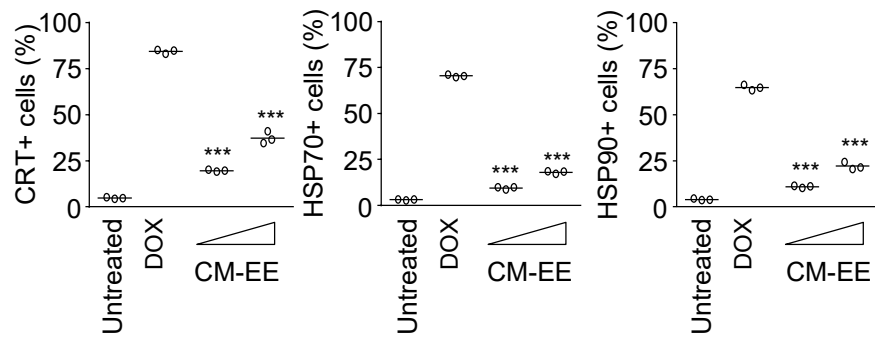

**b**

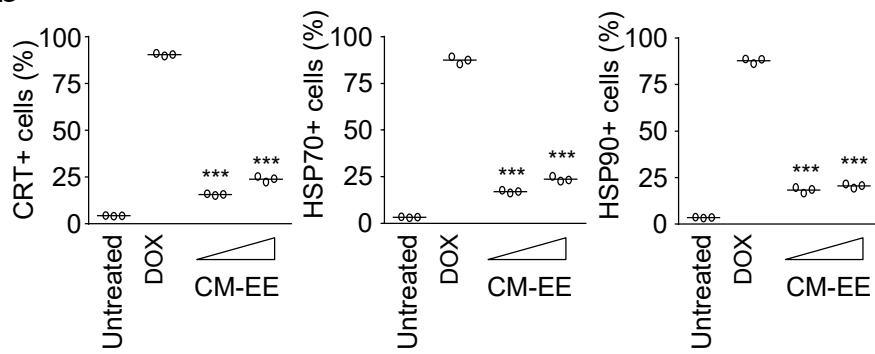

Supplementary Figure 1

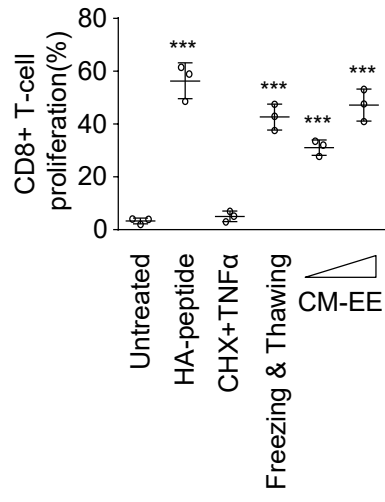

Supplementary Figure 2
